# Supplementary material
Source: publisher figshare collection journal article supplement (https://sage.figshare.com/ndownloader/files/28768622)

**Day 1**

**09:00 - 17:00**

|               |                                                              |
|---------------|--------------------------------------------------------------|
| 09:00 - 09:30 | Welcome and introductions                                    |
| 09:30 - 10:00 | Opening prayer and overview of workshop                      |
| 10:00 - 10:30 | Introduction to digital storytelling                         |
| 10:30 - 10:45 | Break                                                        |
| 10:45 - 12:00 | First talking circle                                         |
| 12:00 - 13:15 | Break, lunch provided                                        |
| 13:15 - 15:00 | Participants work on their story                             |
| 15:00 - 15:15 | Break                                                        |
| 15:15 - 16:00 | Participants record stories, and identify pictures and music |
| 16:00 - 17:00 | Introduction to the iPad app and participants work on videos |

**Day 2**

**09:00 - 17:00**

|               |                                                              |
|---------------|--------------------------------------------------------------|
| 09:00 - 10:30 | Second talking circle                                        |
| 10:30 - 10:45 | Break                                                        |
| 10:45 - 12:00 | Participants explore the app and continue working on videos  |
| 12:00 - 13:00 | Break, lunch provided                                        |
| 13:15 - 14:45 | Participants work on finalizing their videos                 |
| 15:00 - 15:15 | Feast, showcase and viewing of videos                        |
| 16:00 - 17:00 | Final discussion and feedback to inform future study         |
| 17:00         | Distribution of certificates, honorarium, and closing prayer |

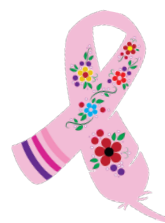

Supplement: Supplementary file [file 28768622]
